# Supplementary material for: Human influenza virus infection elicits distinct patterns of monocyte and dendritic cell mobilization in blood and the nasopharynx
Source: bioRxiv or medRxiv preprint supplement (doi:10.1101/2022.01.18.22269508), 2022-02-10
Supplement: Supplementary file [file media-1.pdf]

| Supplementary Table - Flow cytometry panels |                |                   |                |
|---------------------------------------------|----------------|-------------------|----------------|
| Panel 1: Phenotyping of MNPs from PBMCs     |                |                   |                |
| Fluorochrome                                | Marker         | Company           | Clone          |
| FITC                                        | CD83           | Biolegend         | HB15e          |
| PerCp Cy5.5                                 | CD123          | BD                | 7G3            |
| PE Cy7                                      | CD1c           | Miltenyi          | AD5-8E7        |
| PE Cy5                                      | CD11c          | BD                | B-Ly6          |
| PE TR                                       | HLA-DR         | Life Technologies | TU36           |
| PE                                          | CD141          | Miltenyi          | AD5-14H12      |
| APC-Cy7                                     | CD3            | BD                | SK7            |
|                                             | CD19           | BioLegend         | HIB19          |
|                                             | CD20           | BD                | L27            |
|                                             | CD56           | BD                | HCD56          |
|                                             | CD66abce       | Miltenyi          | TET2           |
| AF700                                       | CD16           | BioLegend         | 3GE            |
| APC                                         | CD45           | BD                | HI30           |
| BV786                                       | CD62L          | BD                | SK11           |
| BV650                                       | CD86           | BD                | 2331           |
| BV605                                       | CCR2           | BioLegend         | K036C2         |
| BV510                                       | CD14           | BD                | M5E2           |
| V450                                        | CCR7           | BD                | 150503         |
| DAPI                                        | Live/Dead Blue | Thermo Fisher     | Cat no: L34962 |

| Panel 2: Phenotyping of PBMCs following TLR stimulation- TNF-release assay |                                                   |                   |                            |
|----------------------------------------------------------------------------|---------------------------------------------------|-------------------|----------------------------|
| Fluorochrome                                                               | Marker                                            | Company           | Clone                      |
| FITC                                                                       | CD83                                              | Biolegend         | HB15e                      |
| PerCp Cy5.5                                                                | CD123                                             | BD                | 7G3                        |
| PE Cy7                                                                     | CD1c                                              | Miltenyi          | AD5-8E7                    |
| PE Cy5                                                                     | CD11c                                             | BD                | B-Ly6                      |
| PE TR                                                                      | HLA-DR                                            | Life Technologies | TU36                       |
| PE                                                                         | <b>TNF-<math>\alpha</math> Detection Antibody</b> | Miltenyi          | (Reagent from 130-091-268) |
| APC-Cy7                                                                    | CD3                                               | BD                | SK7                        |
|                                                                            | CD19                                              | BioLegend         | HIB19                      |
|                                                                            | CD20                                              | BD                | L27                        |
|                                                                            | CD56                                              | BD                | HCD56                      |
|                                                                            | CD66abce                                          | Miltenyi          | TET2                       |
| AF700                                                                      | CD16                                              | BioLegend         | 3GE                        |
| APC                                                                        | CD141                                             | Miltenyi          | AD5-14H12                  |
| BV786                                                                      | CD62L                                             | BD                | SK11                       |
| BV650                                                                      | CD86                                              | BD                | 2331                       |
| BV605                                                                      | CCR2                                              | BioLegend         | K036C2                     |
| BV510                                                                      | CD14                                              | BD                | M5E2                       |
| V450                                                                       | CCR7                                              | BD                | 150503                     |
| DAPI                                                                       | Live/Dead Blue                                    | Thermo Fisher     | Cat no: L34962             |
